# Supplementary material for: Genome sequencing and comparative genomics reveal a repertoire of putative pathogenicity genes in chilli anthracnose fungus Colletotrichum truncatum
Source: PLoS One. 2017 Aug 28;12(8):e0183567. doi: 10.1371/journal.pone.0183567 (PMC5573122; doi:10.1371/journal.pone.0183567)
Supplement: S3 Table — (XLSX) [file pone.0183567.s010.xlsx]

## Sheet: Sheet10
S3 Table. The repetitive elements in C. truncatum genome predicted using RepeatMasker through de novo repeats identified in the genome by RepeatModeler
	Number of elements*	Length occupied (bp)
LTR elements:	759	894041	1.61
DNA elements:	30	14486	0.03
Unclassified:	1762	739856	1.34
Total interspersed repeats:		1656083	2.99
Small RNA:	0	0	0
Satellites:	68	3732	0.01
Simple repeats:	0	0	0
Low complexity:	0	0	0
* Most repeats fragmented by insertions or deletions have been counted as one element
