# Supplementary material for: Genome sequencing and comparative genomics reveal a repertoire of putative pathogenicity genes in chilli anthracnose fungus Colletotrichum truncatum
Source: PLoS One. 2017 Aug 28;12(8):e0183567. doi: 10.1371/journal.pone.0183567 (PMC5573122; doi:10.1371/journal.pone.0183567)
Supplement: S7 Table — (XLSX) [file pone.0183567.s014.xlsx]

## Sheet: Sheet15
S7 Table. Species specific genes in C. truncatum with no homologues in other Colletotrichum species and the SwissProt database
Name	Known domains	Secreted	Putative effector	Gene expression in planta	Gene expression in vitro
CTRU_000052	-	-	-	-	Yes
CTRU_000124	-	-	-	-	Yes
CTRU_000136	-	-	-	-	Yes
CTRU_000173	-	-	-	Yes	Yes
CTRU_000207	-	-	-	-	Yes
CTRU_000246	-	-	-	Yes	Yes
CTRU_000343	-	-	-	-	Yes
CTRU_000358	-	-	-	-	Yes
CTRU_000373	-	-	-	-	Yes
CTRU_000434	-	-	-	-	-
CTRU_000484	-	-	-	-	Yes
CTRU_000492	-	Yes	Yes	Yes	Yes
CTRU_000609	-	-	-	-	Yes
CTRU_000639	-	-	-	-	Yes
CTRU_000645	-	-	-	-	Yes
CTRU_000683	-	-	-	-	-
CTRU_000797	-	Yes	-	Yes	Yes
CTRU_000842	-	-	-	Yes	-
CTRU_000875	-	-	-	-	-
CTRU_000934	-	-	-	-	-
CTRU_001052	-	-	-	-	Yes
CTRU_001172	-	-	-	-	Yes
CTRU_001190	-	-	-	-	Yes
CTRU_001191	-	-	-	-	Yes
CTRU_001192	-	-	-	-	-
CTRU_001198	-	-	-	-	Yes
CTRU_001238	-	-	-	Yes	-
CTRU_001293	-	-	-	-	Yes
CTRU_001308	-	-	-	-	Yes
CTRU_001349	-	-	-	-	Yes
CTRU_001487	-	-	-	-	Yes
CTRU_001501	-	-	-	-	Yes
CTRU_001504	-	-	-	-	Yes
CTRU_001612	-	-	-	-	Yes
CTRU_001626	-	Yes	-	-	-
CTRU_001631	-	-	-	-	Yes
CTRU_001655	-	-	-	-	-
CTRU_001714	Pfam:PF13649	-	-	-	-
CTRU_001736	-	-	-	-	Yes
CTRU_001749	-	-	-	-	Yes
CTRU_001877	-	-	-	-	Yes
CTRU_001911	-	-	-	-	Yes
CTRU_001947	-	-	-	-	Yes
CTRU_002056	-	-	-	-	-
CTRU_002181	-	-	-	-	-
CTRU_002252	InterPro:IPR010451, Pfam:PF06314	-	-	-	Yes
CTRU_002253	-	-	-	Yes	Yes
CTRU_002258	-	Yes	Yes	-	Yes
CTRU_002273	-	-	-	-	Yes
CTRU_002274	-	-	-	-	Yes
CTRU_002357	-	-	-	-	-
CTRU_002362	-	-	-	-	Yes
CTRU_002448	-	-	-	Yes	Yes
CTRU_002477	-	Yes	Yes	-	Yes
CTRU_002523	-	-	-	-	-
CTRU_002526	-	-	-	-	-
CTRU_002567	-	-	-	-	Yes
CTRU_002589	-	-	-	-	Yes
CTRU_002656	-	-	-	-	Yes
CTRU_002705	-	-	-	-	-
CTRU_002901	-	Yes	Yes	Yes	-
CTRU_002994	-	-	-	-	Yes
CTRU_003015	-	-	-	-	Yes
CTRU_003030	-	-	-	-	Yes
CTRU_003031	-	-	-	-	Yes
CTRU_003076	-	-	-	-	Yes
CTRU_003126	-	-	-	-	Yes
CTRU_003163	-	-	-	-	Yes
CTRU_003189	-	Yes	-	-	Yes
CTRU_003213	-	-	-	-	Yes
CTRU_003273	-	-	-	-	Yes
CTRU_003305	-	Yes	Yes	-	Yes
CTRU_003307	-	-	-	-	Yes
CTRU_003310	-	-	-	Yes	Yes
CTRU_003366	-	-	-	-	Yes
CTRU_003375	-	-	-	-	Yes
CTRU_003430	-	-	-	-	Yes
CTRU_003462	-	Yes	-	-	Yes
CTRU_003463	-	-	-	-	Yes
CTRU_003472	-	Yes	-	Yes	Yes
CTRU_003500	-	-	-	Yes	Yes
CTRU_003523	-	-	-	-	Yes
CTRU_003527	-	-	-	-	Yes
CTRU_003533	-	-	-	Yes	Yes
CTRU_003538	-	-	-	-	-
CTRU_003554	-	-	-	-	Yes
CTRU_003658	-	-	-	-	-
CTRU_003661	-	-	-	-	-
CTRU_003709	-	-	-	Yes	Yes
CTRU_003716	-	-	-	-	Yes
CTRU_003717	-	-	-	-	Yes
CTRU_003718	-	-	-	-	Yes
CTRU_003738	-	-	-	-	Yes
CTRU_003741	-	-	-	Yes	Yes
CTRU_003764	-	-	-	-	Yes
CTRU_003809	-	-	-	-	Yes
CTRU_003839	-	-	-	-	Yes
CTRU_003861	-	-	-	Yes	Yes
CTRU_003864	-	-	-	-	Yes
CTRU_003871	-	-	-	Yes	Yes
CTRU_003890	-	-	-	-	Yes
CTRU_004033	-	-	-	-	Yes
CTRU_004044	-	-	-	-	Yes
CTRU_004055	-	-	-	Yes	Yes
CTRU_004126	-	-	-	-	Yes
CTRU_004167	-	-	-	-	Yes
CTRU_004191	-	Yes	Yes	-	Yes
CTRU_004225	-	-	-	-	Yes
CTRU_004285	-	-	-	Yes	Yes
CTRU_004300	-	-	-	-	Yes
CTRU_004327	-	-	-	-	Yes
CTRU_004372	-	-	-	-	-
CTRU_004395	-	-	-	-	Yes
CTRU_004459	-	-	-	-	Yes
CTRU_004473	-	-	-	Yes	Yes
CTRU_004495	InterPro:IPR018724, Pfam:PF10014	-	-	-	-
CTRU_004535	-	-	-	-	Yes
CTRU_004549	-	-	-	-	Yes
CTRU_004575	-	-	-	Yes	Yes
CTRU_004633	InterPro:IPR009959, Pfam:PF12680	-	-	-	Yes
CTRU_004684	-	-	-	-	Yes
CTRU_004723	InterPro:IPR010721, Pfam:PF06966	-	-	-	-
CTRU_004754	-	Yes	-	-	Yes
CTRU_004755	-	-	-	-	-
CTRU_004796	-	-	-	-	Yes
CTRU_004822	-	-	-	-	Yes
CTRU_004853	-	-	-	-	-
CTRU_004909	-	-	-	-	Yes
CTRU_004981	-	Yes	-	-	Yes
CTRU_005015	-	-	-	-	-
CTRU_005024	-	-	-	-	-
CTRU_005182	-	-	-	-	Yes
CTRU_005224	-	-	-	Yes	Yes
CTRU_005344	-	-	-	Yes	Yes
CTRU_005385	-	Yes	Yes	-	-
CTRU_005469	-	-	-	-	Yes
CTRU_005530	-	-	-	-	-
CTRU_005531	-	-	-	-	Yes
CTRU_005533	-	-	-	-	Yes
CTRU_005633	-	-	-	-	Yes
CTRU_005639	-	-	-	-	-
CTRU_005658	-	-	-	Yes	Yes
CTRU_005659	-	-	-	Yes	Yes
CTRU_005738	-	-	-	-	Yes
CTRU_005740	-	-	-	-	Yes
CTRU_005742	-	Yes	-	-	Yes
CTRU_005744	-	-	-	-	Yes
CTRU_005745	-	-	-	Yes	Yes
CTRU_005750	-	-	-	-	Yes
CTRU_005840	-	-	-	-	Yes
CTRU_005841	-	-	-	-	Yes
CTRU_005897	-	-	-	-	Yes
CTRU_005898	-	-	-	-	Yes
CTRU_005924	-	-	-	-	Yes
CTRU_005957	-	-	-	-	Yes
CTRU_006037	InterPro:IPR011058, Pfam:PF08881	Yes	Yes	-	-
CTRU_006046	-	Yes	Yes	-	-
CTRU_006055	-	-	-	Yes	Yes
CTRU_006063	-	-	-	Yes	Yes
CTRU_006175	-	-	-	-	Yes
CTRU_006229	-	-	-	-	Yes
CTRU_006255	-	-	-	-	Yes
CTRU_006269	-	-	-	-	Yes
CTRU_006271	-	-	-	-	-
CTRU_006317	-	-	-	-	Yes
CTRU_006324	-	-	-	-	Yes
CTRU_006371	-	Yes	-	-	-
CTRU_006427	InterPro:IPR006759, Pfam:PF04666	-	-	-	Yes
CTRU_006513	-	-	-	-	-
CTRU_006577	-	-	-	-	Yes
CTRU_006645	-	-	-	-	Yes
CTRU_006646	-	-	-	-	-
CTRU_006653	-	-	-	-	Yes
CTRU_006691	-	-	-	-	Yes
CTRU_006813	-	-	-	-	Yes
CTRU_006935	-	-	-	-	-
CTRU_006936	-	-	-	Yes	Yes
CTRU_006958	-	-	-	-	Yes
CTRU_006985	-	-	-	-	Yes
CTRU_007078	-	-	-	Yes	Yes
CTRU_007310	-	-	-	-	Yes
CTRU_007367	-	-	-	Yes	Yes
CTRU_007425	-	-	-	Yes	Yes
CTRU_007461	-	-	-	-	Yes
CTRU_007486	-	-	-	-	-
CTRU_007561	-	-	-	Yes	Yes
CTRU_007564	-	-	-	-	Yes
CTRU_007597	InterPro:IPR005146, Pfam:PF03483	-	-	-	Yes
CTRU_007603	-	-	-	-	Yes
CTRU_007647	-	-	-	-	Yes
CTRU_007648	InterPro:IPR024983, Pfam:PF12770	-	-	-	Yes
CTRU_007716	-	Yes	Yes	-	Yes
CTRU_007740	-	-	-	-	-
CTRU_007757	-	-	-	-	Yes
CTRU_007812	-	-	-	-	Yes
CTRU_007827	-	-	-	Yes	Yes
CTRU_007851	-	-	-	-	-
CTRU_007886	-	-	-	-	Yes
CTRU_007887	-	-	-	-	-
CTRU_007921	InterPro:IPR025363, Pfam:PF14087	-	-	Yes	-
CTRU_007925	-	-	-	-	Yes
CTRU_007984	-	-	-	Yes	Yes
CTRU_008028	-	-	-	Yes	Yes
CTRU_008104	-	-	-	-	Yes
CTRU_008149	-	-	-	-	Yes
CTRU_008161	-	-	-	-	Yes
CTRU_008231	-	-	-	-	Yes
CTRU_008251	-	-	-	-	Yes
CTRU_008257	-	-	-	Yes	Yes
CTRU_008258	-	-	-	-	Yes
CTRU_008267	-	-	-	-	Yes
CTRU_008278	-	-	-	-	Yes
CTRU_008308	-	-	-	-	Yes
CTRU_008330	-	-	-	-	Yes
CTRU_008351	-	-	-	-	Yes
CTRU_008485	-	-	-	Yes	Yes
CTRU_008562	-	-	-	Yes	Yes
CTRU_008578	-	-	-	-	-
CTRU_008579	-	-	-	-	-
CTRU_008618	-	-	-	-	-
CTRU_008649	-	-	-	Yes	-
CTRU_008658	-	-	-	-	-
CTRU_008676	-	-	-	-	Yes
CTRU_008745	-	-	-	-	Yes
CTRU_008784	-	-	-	-	Yes
CTRU_008814	-	-	-	-	Yes
CTRU_008824	-	-	-	-	Yes
CTRU_008870	-	-	-	-	Yes
CTRU_008872	-	-	-	Yes	Yes
CTRU_008887	-	-	-	-	Yes
CTRU_008930	-	-	-	-	Yes
CTRU_008976	-	-	-	-	-
CTRU_008988	-	-	-	Yes	Yes
CTRU_009063	-	-	-	-	Yes
CTRU_009064	-	-	-	-	Yes
CTRU_009114	-	-	-	-	Yes
CTRU_009217	-	-	-	-	Yes
CTRU_009265	-	-	-	-	Yes
CTRU_009268	-	-	-	-	Yes
CTRU_009273	-	Yes	Yes	-	-
CTRU_009281	-	-	-	Yes	Yes
CTRU_009327	-	-	-	-	Yes
CTRU_009497	-	-	-	-	Yes
CTRU_009526	-	-	-	-	Yes
CTRU_009527	-	-	-	Yes	Yes
CTRU_009550	-	-	-	Yes	Yes
CTRU_009572	-	-	-	-	Yes
CTRU_009622	-	-	-	-	Yes
CTRU_009632	-	-	-	-	-
CTRU_009633	-	-	-	-	-
CTRU_009700	-	-	-	-	Yes
CTRU_009730	-	-	-	-	-
CTRU_009744	-	-	-	-	-
CTRU_009927	-	-	-	-	-
CTRU_009990	-	-	-	Yes	Yes
CTRU_010064	-	Yes	Yes	-	Yes
CTRU_010086	-	-	-	-	-
CTRU_010093	-	-	-	Yes	Yes
CTRU_010132	-	-	-	-	-
CTRU_010235	-	-	-	-	Yes
CTRU_010254	-	-	-	Yes	Yes
CTRU_010322	-	-	-	-	Yes
CTRU_010350	-	-	-	-	Yes
CTRU_010364	-	Yes	Yes	-	-
CTRU_010368	-	-	-	-	Yes
CTRU_010405	-	-	-	-	Yes
CTRU_010411	-	-	-	-	Yes
CTRU_010414	-	-	-	Yes	Yes
CTRU_010519	-	-	-	-	Yes
CTRU_010545	-	-	-	-	Yes
CTRU_010546	-	-	-	-	Yes
CTRU_010567	-	-	-	-	Yes
CTRU_010611	-	-	-	Yes	Yes
CTRU_010757	InterPro:IPR025363, Pfam:PF14087	-	-	Yes	Yes
CTRU_010797	-	-	-	-	Yes
CTRU_010811	-	-	-	-	Yes
CTRU_010816	-	-	-	Yes	Yes
CTRU_010944	-	-	-	Yes	Yes
CTRU_010961	-	-	-	-	Yes
CTRU_011008	-	-	-	-	Yes
CTRU_011026	-	-	-	-	Yes
CTRU_011033	-	-	-	-	Yes
CTRU_011061	-	-	-	-	Yes
CTRU_011101	-	-	-	-	-
CTRU_011185	-	-	-	-	Yes
CTRU_011232	-	-	-	-	Yes
CTRU_011264	-	-	-	-	Yes
CTRU_011404	-	Yes	-	Yes	Yes
CTRU_011419	-	-	-	Yes	Yes
CTRU_011467	-	-	-	-	Yes
CTRU_011490	-	-	-	-	Yes
CTRU_011497	InterPro:IPR021858, Pfam:PF11951	-	-	-	Yes
CTRU_011499	-	-	-	Yes	Yes
CTRU_011520	-	-	-	-	Yes
CTRU_011526	-	-	-	-	-
CTRU_011590	-	-	-	Yes	Yes
CTRU_011695	-	-	-	Yes	Yes
CTRU_011698	-	-	-	-	Yes
CTRU_011721	-	Yes	Yes	Yes	Yes
CTRU_011735	-	-	-	-	Yes
CTRU_011755	-	-	-	Yes	Yes
CTRU_011757	-	-	-	Yes	-
CTRU_011780	-	Yes	Yes	-	Yes
CTRU_011872	-	Yes	-	-	Yes
CTRU_011877	-	-	-	-	Yes
CTRU_011887	-	-	-	-	Yes
CTRU_011907	-	-	-	-	Yes
CTRU_011924	-	Yes	Yes	-	-
CTRU_011943	-	-	-	Yes	-
CTRU_011999	-	Yes	Yes	Yes	-
CTRU_012153	-	-	-	-	Yes
CTRU_012157	-	Yes	Yes	-	Yes
CTRU_012167	-	-	-	Yes	Yes
CTRU_012178	-	-	-	Yes	Yes
CTRU_012183	-	-	-	-	Yes
CTRU_012184	-	-	-	-	-
CTRU_012246	-	-	-	-	Yes
CTRU_012292	-	Yes	Yes	-	Yes
CTRU_012312	-	-	-	-	Yes
CTRU_012433	-	-	-	-	-
CTRU_012444	-	-	-	-	Yes
CTRU_012451	-	Yes	Yes	-	Yes
CTRU_012540	-	-	-	Yes	Yes
CTRU_012548	-	-	-	-	-
CTRU_012687	-	-	-	-	Yes
CTRU_012710	-	-	-	-	Yes
CTRU_012744	-	-	-	-	-
CTRU_012746	Pfam:PF13669	-	-	-	-
CTRU_012779	-	-	-	Yes	Yes
CTRU_012826	-	Yes	Yes	-	Yes
CTRU_012831	-	-	-	-	Yes
CTRU_012858	-	-	-	-	Yes
CTRU_012891	-	-	-	-	Yes
CTRU_012896	-	-	-	-	Yes
CTRU_012960	-	-	-	Yes	Yes
CTRU_012961	-	-	-	Yes	Yes
CTRU_012971	-	-	-	-	-
CTRU_012979	-	-	-	-	Yes
CTRU_012983	InterPro:IPR000073, Pfam:PF12697	-	-	Yes	Yes
CTRU_012992	-	-	-	-	Yes
CTRU_012996	-	-	-	-	Yes
CTRU_013058	-	-	-	-	-
CTRU_013059	-	-	-	-	-
CTRU_013065	-	-	-	-	Yes
CTRU_013085	-	-	-	-	Yes
CTRU_013088	-	-	-	-	Yes
CTRU_013093	-	-	-	-	-
CTRU_013094	InterPro:IPR008733, Pfam:PF05648	-	-	-	-
CTRU_013095	-	-	-	-	Yes
CTRU_013099	-	-	-	Yes	Yes
CTRU_013112	-	-	-	-	Yes
CTRU_013144	-	-	-	-	Yes
CTRU_013259	-	-	-	Yes	-
CTRU_013275	-	-	-	-	Yes
CTRU_013281	-	-	-	Yes	Yes
CTRU_013334	-	-	-	-	Yes
CTRU_013335	-	-	-	-	Yes
CTRU_013357	-	-	-	-	Yes
CTRU_013363	-	-	-	-	Yes
CTRU_013364	-	-	-	-	Yes
CTRU_013365	-	-	-	-	-
CTRU_013372	-	-	-	-	Yes
CTRU_013506	-	-	-	-	Yes
CTRU_013507	-	-	-	-	Yes
CTRU_013559	-	-	-	Yes	-
CTRU_013560	-	-	-	Yes	-
CTRU_013576	-	-	-	-	-
CTRU_013598	-	-	-	Yes	Yes
CTRU_013613	-	-	-	-	-
CTRU_013616	-	-	-	-	-
CTRU_013629	-	-	-	Yes	Yes
CTRU_013650	-	-	-	-	-
CTRU_013657	-	Yes	Yes	-	-
CTRU_013666	-	-	-	Yes	Yes
CTRU_013709	-	Yes	Yes	Yes	Yes
CTRU_013713	-	-	-	Yes	Yes
CTRU_013725	InterPro:IPR018824, Pfam:PF10346	-	-	Yes	Yes
