# Supplementary material for: Genome sequencing and comparative genomics reveal a repertoire of putative pathogenicity genes in chilli anthracnose fungus Colletotrichum truncatum
Source: PLoS One. 2017 Aug 28;12(8):e0183567. doi: 10.1371/journal.pone.0183567 (PMC5573122; doi:10.1371/journal.pone.0183567)
Supplement: S17 Table — (XLSX) [file pone.0183567.s024.xlsx]

## Sheet: Sheet16
S17 Table. Fold changes in C. truncatum genes common for in vitro samples (APR and PDA in comparison CZ) and in planta samples (24 and 72 hpi in comparison with 0 hpi).
Gene	APR	PDA	24 hpi	72 hpi
CTRU_000355	3.53619	1.27393	7.34733	7.75491
CTRU_001844	2.60816	3.68727	8.49934	9.49188
CTRU_001845	2.77578	3.79897	8.49934	9.49188
CTRU_002103	3.17715	1.10509	9.0843	8.07684
CTRU_002414	7.53719	6.2894	3.46959	5.08588
CTRU_002856	7.63655	2.33219	3.90108	7.75491
CTRU_002857	10.2395	2.38542	10.0843	9.49188
CTRU_002880	9.77892	7.83331	10.6693	9.07684
CTRU_003333	15.0573	9.56098	10.6693	10.0768
CTRU_003335	14.0631	12.8677	10.6693	10.0768
CTRU_003336	12.2053	15.7451	11.6693	11.0768
CTRU_003847	17.0057	15.1532	10.0843	9.49188
CTRU_003929	2.50649	1.35754	6.66926	6.75491
CTRU_004317	9.12099	2.65736	10.6693	10.0768
CTRU_004728	13.8504	8.18433	11.6693	11.0768
CTRU_004729	13.1762	4.99499	10.6693	10.0768
CTRU_004892	7.50105	3.06916	8.0843	7.07684
CTRU_004942	6.44355	3.65858	7.20983	7.75491
CTRU_005133	4.16742	4.84362	10.0843	7.90691
CTRU_005424	7.61063	6.60261	6.17741	7.90691
CTRU_005425	5.26189	6.71178	6.54373	9.62938
CTRU_005465	10.5929	9.79352	10.0843	7.90691
CTRU_005637	3.52863	3.39736	6.0843	4.90691
CTRU_005690	7.38295	4.53418	6.96882	6.26948
CTRU_005845	6.91394	1.91211	4.78662	5.43298
CTRU_006104	8.08717	2.77185	8.34733	8.49188
CTRU_006167	6.6736	3.44913	10.0843	9.49188
CTRU_006197	4.85207	6.07392	3.05455	2.00002
CTRU_006233	1.80871	3.00304	2.60317	2.69313
CTRU_006496	4.98777	6.64256	4.45981	6.90691
CTRU_006914	4.70687	4.29656	8.76237	8.90691
CTRU_007215	5.58987	1.49115	5.31171	4.65057
CTRU_007444	2.42231	1.15626	2.243	3.81005
CTRU_007530	1.68495	2.67449	7.49934	5.95582
CTRU_008233	4.76106	4.23614	6.02541	5.49188
CTRU_008648	2.94738	3.28251	10.0843	9.49188
CTRU_008700	6.48459	7.15566	10.6693	10.0768
CTRU_008818	3.93666	1.63706	6.27695	6.16995
CTRU_008819	3.70098	1.59311	6.27695	6.26948
CTRU_009323	3.02617	1.73772	2.18646	3.36259
CTRU_009326	8.50415	1.71313	10.0843	9.49188
CTRU_009523	10.4173	10.5648	10.0843	9.49188
CTRU_009602	5.71531	10.8301	6.49934	7.16995
CTRU_009603	6.70673	11.7135	9.0843	9.49188
CTRU_009652	7.41605	4.80748	9.0843	9.49188
CTRU_009720	3.00763	1.55217	7.49934	6.16995
CTRU_009726	2.59608	1.94477	5.20983	5.3764
CTRU_010032	12.2739	5.00813	6.91438	6.90691
CTRU_010083	2.49249	1.82199	6.62487	6.03244
CTRU_010327	4.87881	10.2358	9.0843	10.0768
CTRU_010636	3.27953	3.16779	10.6693	10.0768
CTRU_010646	6.21961	5.42426	6.27695	7.49188
CTRU_010656	8.09287	4.50706	6.62487	4.47692
CTRU_011307	3.47529	2.04914	7.86191	10.0768
CTRU_011322	5.60901	2.48339	1.87363	1.25826
CTRU_011796	1.12386	1.27545	5.243	5.75491
CTRU_012030	9.04917	9.73724	8.34733	10.0768
CTRU_012032	6.26726	3.85348	7.86191	10.0768
CTRU_012356	2.51957	1.13721	6.66926	5.82891
CTRU_013021	3.35468	5.5318	6.5818	8.49188
CTRU_013283	2.2617	3.81656	7.34733	10.0768
CTRU_000021	-2.15237	-2.16236	NA	NA
CTRU_000040	-1.92836	-2.13785	NA	NA
CTRU_000044	-1.8636	-2.40659	NA	NA
CTRU_000064	-5.49171	-2.62477	NA	NA
CTRU_000108	-3.91332	-2.76916	NA	NA
CTRU_000149	-1.23731	-1.53657	NA	NA
CTRU_000175	-3.6618	-2.91459	NA	NA
CTRU_000176	-3.00738	-3.03065	NA	NA
CTRU_000217	-6.75642	-4.31105	NA	NA
CTRU_000304	-1.76668	-1.50087	NA	NA
CTRU_000328	-3.08408	-3.30831	NA	NA
CTRU_000344	-1.49	-1.77094	NA	NA
CTRU_000365	-1.8523	-2.32823	NA	NA
CTRU_000403	-1.57088	-1.55098	NA	NA
CTRU_000468	-1.69587	-3.12315	NA	NA
CTRU_000480	-1.33343	-1.72693	NA	NA
CTRU_000531	-1.58829	-2.41833	NA	NA
CTRU_000535	-3.26458	-2.0998	NA	NA
CTRU_000537	-2.58673	-1.6216	NA	NA
CTRU_000564	-1.30857	-2.18419	NA	NA
CTRU_000579	-2.42877	-5.75956	NA	NA
CTRU_000584	-1.74724	-1.78686	NA	NA
CTRU_000586	-2.91101	-2.27166	NA	NA
CTRU_000588	-2.92415	-2.76916	NA	NA
CTRU_000611	-1.10176	-1.13776	NA	NA
CTRU_000649	-5.34398	-2.0622	NA	NA
CTRU_000679	-1.17266	-1.68819	NA	NA
CTRU_000712	-2.78675	-5.89201	NA	NA
CTRU_000754	-6.12774	-3.57651	NA	NA
CTRU_000785	-3.47762	-3.52015	NA	NA
CTRU_000786	-6.24917	-2.73673	NA	NA
CTRU_000810	-1.83298	-4.03826	NA	NA
CTRU_000825	-1.46571	-3.53519	NA	NA
CTRU_000836	-6.95659	-2.4737	NA	NA
CTRU_000839	-2.15212	-1.54062	NA	NA
CTRU_000911	-3.94457	-1.93908	NA	NA
CTRU_000912	-6.29957	-3.74828	NA	NA
CTRU_000929	-6.42327	-2.12609	NA	NA
CTRU_000958	-4.72582	-3.08601	NA	NA
CTRU_000982	-2.90934	-1.72734	NA	NA
CTRU_000984	-2.38853	-3.39921	NA	NA
CTRU_000992	-1.69821	-1.26153	NA	NA
CTRU_000993	-3.26362	-3.27589	NA	NA
CTRU_001003	-7.62412	-4.90467	NA	NA
CTRU_001004	-2.72857	-2.71716	NA	NA
CTRU_001078	-2.23697	-2.54437	NA	NA
CTRU_001104	-3.37826	-1.47864	NA	NA
CTRU_001142	-2.42476	-1.39976	NA	NA
CTRU_001208	-3.72447	-1.91538	NA	NA
CTRU_001263	-5.23658	-3.50612	NA	NA
CTRU_001273	-2.98765	-3.13594	NA	NA
CTRU_001280	-2.28966	-1.49509	NA	NA
CTRU_001287	-1.2484	-1.37117	NA	NA
CTRU_001302	-3.31301	-1.95471	NA	NA
CTRU_001309	-8.86843	-3.47244	NA	NA
CTRU_001314	-2.35117	-2.55545	NA	NA
CTRU_001365	-2.43457	-1.80831	NA	NA
CTRU_001366	-2.351	-1.59923	NA	NA
CTRU_001367	-4.06132	-2.81355	NA	NA
CTRU_001373	-2.30969	-2.4791	NA	NA
CTRU_001406	-2.11347	-1.76916	NA	NA
CTRU_001407	-2.79642	-2.57044	NA	NA
CTRU_001414	-3.75586	-2.16147	NA	NA
CTRU_001468	-4.98166	-2.78004	NA	NA
CTRU_001505	-2.08021	-1.59923	NA	NA
CTRU_001513	-3.52029	-2.20656	NA	NA
CTRU_001534	-6.61298	-3.96846	NA	NA
CTRU_001557	-3.57201	-3.86226	NA	NA
CTRU_001574	-4.50533	-1.58755	NA	NA
CTRU_001579	-1.88997	-1.5627	NA	NA
CTRU_001581	-7.75154	-2.08466	NA	NA
CTRU_001591	-3.89965	-3.99316	NA	NA
CTRU_001594	-2.69563	-3.01016	NA	NA
CTRU_001595	-1.90548	-1.90504	NA	NA
CTRU_001619	-9.75199	-8.49934	NA	NA
CTRU_001623	-3.36292	-3.18419	NA	NA
CTRU_001630	-2.88848	-2.02069	NA	NA
CTRU_001690	-1.14845	-1.53037	NA	NA
CTRU_001695	-5.44227	-2.5446	NA	NA
CTRU_001751	-4.76501	-4.19365	NA	NA
CTRU_001824	-6.80743	-5.18419	NA	NA
CTRU_001942	-1.58377	-2.20207	NA	NA
CTRU_001952	-2.17108	-1.84933	NA	NA
CTRU_002054	-1.49205	-2.44624	NA	NA
CTRU_002093	-1.94097	-1.3213	NA	NA
CTRU_002099	-2.30558	-2.14355	NA	NA
CTRU_002111	-2.36454	-1.37256	NA	NA
CTRU_002147	-1.392	-2.06981	NA	NA
CTRU_002150	-3.59097	-4.28853	NA	NA
CTRU_002160	-2.24897	-4.8632	NA	NA
CTRU_002161	-4.7763	-5.68244	NA	NA
CTRU_002172	-2.51017	-3.67003	NA	NA
CTRU_002173	-1.54934	-2.39296	NA	NA
CTRU_002188	-2.24913	-1.97079	NA	NA
CTRU_002198	-2.12203	-1.59389	NA	NA
CTRU_002225	-1.89018	-1.22636	NA	NA
CTRU_002242	-2.48904	-2.60205	NA	NA
CTRU_002245	-2.64155	-2.01559	NA	NA
CTRU_002252	-3.00155	-2.4252	NA	NA
CTRU_002257	-3.6247	-5.21567	NA	NA
CTRU_002271	-2.5767	-2.73168	NA	NA
CTRU_002295	-2.55795	-2.40659	NA	NA
CTRU_002296	-2.02806	-3.60817	NA	NA
CTRU_002325	-2.53514	-2.15618	NA	NA
CTRU_002326	-2.13222	-2.40507	NA	NA
CTRU_002367	-2.13137	-1.88738	NA	NA
CTRU_002392	-4.1709	-5.78411	NA	NA
CTRU_002393	-2.04033	-2.12975	NA	NA
CTRU_002400	-4.41207	-4.0255	NA	NA
CTRU_002401	-6.71717	-2.35412	NA	NA
CTRU_002408	-6.12123	-4.45098	NA	NA
CTRU_002420	-2.07565	-6.2128	NA	NA
CTRU_002427	-2.95594	-1.50612	NA	NA
CTRU_002432	-2.96791	-2.83998	NA	NA
CTRU_002433	-2.86549	-2.6836	NA	NA
CTRU_002466	-1.58063	-1.36364	NA	NA
CTRU_002490	-1.41126	-2.18047	NA	NA
CTRU_002493	-1.90532	-3.01043	NA	NA
CTRU_002506	-1.91855	-2.17283	NA	NA
CTRU_002507	-3.61549	-3.22669	NA	NA
CTRU_002543	-2.43324	-2.5627	NA	NA
CTRU_002556	-3.63304	-2.15995	NA	NA
CTRU_002581	-2.71179	-4.93366	NA	NA
CTRU_002582	-2.92705	-5.54962	NA	NA
CTRU_002604	-4.78239	-2.39365	NA	NA
CTRU_002639	-4.07937	-4.69158	NA	NA
CTRU_002691	-1.52099	-1.32481	NA	NA
CTRU_002696	-2.23364	-1.24005	NA	NA
CTRU_002724	-1.32427	-2.45585	NA	NA
CTRU_002738	-3.52986	-3.76452	NA	NA
CTRU_002784	-1.69836	-1.36284	NA	NA
CTRU_002892	-6.20975	-2.68669	NA	NA
CTRU_002908	-3.29748	-5.4696	NA	NA
CTRU_002924	-2.72089	-1.97269	NA	NA
CTRU_002946	-3.68264	-3.19542	NA	NA
CTRU_002989	-2.25639	-1.62852	NA	NA
CTRU_003012	-2.31888	-1.94009	NA	NA
CTRU_003053	-3.01419	-1.41497	NA	NA
CTRU_003054	-3.4045	-2.05866	NA	NA
CTRU_003060	-1.79699	-2.05474	NA	NA
CTRU_003070	-1.95756	-1.84502	NA	NA
CTRU_003091	-2.74673	-2.20804	NA	NA
CTRU_003110	-2.1672	-2.79382	NA	NA
CTRU_003133	-2.01413	-2.24122	NA	NA
CTRU_003229	-2.70238	-2.70775	NA	NA
CTRU_003239	-1.45416	-1.4225	NA	NA
CTRU_003257	-3.91666	-2.79563	NA	NA
CTRU_003290	-2.52921	-2.14075	NA	NA
CTRU_003348	-1.5398	-1.64976	NA	NA
CTRU_003352	-3.77049	-3.10526	NA	NA
CTRU_003353	-3.5699	-2.78162	NA	NA
CTRU_003359	-1.93373	-2.65482	NA	NA
CTRU_003402	-3.14606	-4.6135	NA	NA
CTRU_003475	-2.6171	-3.02807	NA	NA
CTRU_003487	-2.91719	-5.33807	NA	NA
CTRU_003490	-3.09808	-3.14893	NA	NA
CTRU_003501	-5.28225	-3.59358	NA	NA
CTRU_003506	-6.17248	-4.22859	NA	NA
CTRU_003517	-2.29923	-2.25614	NA	NA
CTRU_003529	-2.45776	-4.10383	NA	NA
CTRU_003530	-3.91415	-9.2185	NA	NA
CTRU_003605	-2.13561	-2.24309	NA	NA
CTRU_003645	-2.57249	-3.13256	NA	NA
CTRU_003651	-7.28601	-2.41353	NA	NA
CTRU_003654	-2.28899	-3.03219	NA	NA
CTRU_003668	-2.9443	-2.07728	NA	NA
CTRU_003669	-4.38427	-3.67605	NA	NA
CTRU_003675	-3.02427	-1.8075	NA	NA
CTRU_003754	-3.43293	-3.16048	NA	NA
CTRU_003769	-8.69654	-1.63671	NA	NA
CTRU_003781	-2.72164	-2.48272	NA	NA
CTRU_003784	-2.75457	-1.52399	NA	NA
CTRU_003832	-2.3238	-2.4643	NA	NA
CTRU_003893	-1.91157	-4.02488	NA	NA
CTRU_003895	-1.92664	-2.80868	NA	NA
CTRU_003936	-2.42253	-2.31348	NA	NA
CTRU_003937	-1.5345	-1.77935	NA	NA
CTRU_003994	-1.79882	-3.09673	NA	NA
CTRU_004000	-3.85526	-4.27166	NA	NA
CTRU_004003	-1.18884	-2.32465	NA	NA
CTRU_004048	-2.36656	-1.52082	NA	NA
CTRU_004113	-5.40005	-2.15136	NA	NA
CTRU_004164	-1.97246	-1.71978	NA	NA
CTRU_004208	-1.76081	-1.49997	NA	NA
CTRU_004342	-5.03214	-4.0255	NA	NA
CTRU_004376	-3.57646	-4.50612	NA	NA
CTRU_004377	-9.65334	-3.72851	NA	NA
CTRU_004391	-1.40193	-2.86309	NA	NA
CTRU_004401	-3.25294	-2.76916	NA	NA
CTRU_004407	-8.51967	-7.8881	NA	NA
CTRU_004441	-5.40762	-4.59923	NA	NA
CTRU_004478	-2.41074	-2.38376	NA	NA
CTRU_004510	-6.09657	-3.18419	NA	NA
CTRU_004511	-8.5363	-3.11019	NA	NA
CTRU_004517	-2.10012	-1.63165	NA	NA
CTRU_004547	-3.90733	-1.85796	NA	NA
CTRU_004600	-5.55087	-6.4696	NA	NA
CTRU_004607	-1.27181	-1.82596	NA	NA
CTRU_004631	-3.38698	-1.73439	NA	NA
CTRU_004636	-4.25056	-5.48187	NA	NA
CTRU_004642	-3.54115	-4.70775	NA	NA
CTRU_004737	-2.00195	-1.87607	NA	NA
CTRU_004772	-2.58436	-3.17288	NA	NA
CTRU_004795	-4.55302	-2.50612	NA	NA
CTRU_004811	-6.35655	-1.65218	NA	NA
CTRU_004828	-3.30097	-2.03405	NA	NA
CTRU_004843	-4.23256	-3.99155	NA	NA
CTRU_004847	-1.22538	-1.35884	NA	NA
CTRU_004856	-2.24758	-1.61604	NA	NA
CTRU_004860	-2.14717	-6.29711	NA	NA
CTRU_004915	-2.0544	-2.54847	NA	NA
CTRU_004922	-1.44544	-3.93797	NA	NA
CTRU_004950	-2.3677	-1.5838	NA	NA
CTRU_004996	-7.28027	-3.88463	NA	NA
CTRU_005066	-1.73254	-1.28734	NA	NA
CTRU_005094	-1.39744	-2.28035	NA	NA
CTRU_005095	-1.452	-1.33292	NA	NA
CTRU_005102	-5.86035	-3.1129	NA	NA
CTRU_005113	-1.69467	-3.43515	NA	NA
CTRU_005128	-3.46539	-3.06334	NA	NA
CTRU_005215	-1.37482	-2.19201	NA	NA
CTRU_005234	-4.03329	-3.93015	NA	NA
CTRU_005235	-1.36122	-3.84015	NA	NA
CTRU_005245	-1.28561	-1.86499	NA	NA
CTRU_005261	-2.43678	-1.86341	NA	NA
CTRU_005268	-2.90021	-1.94181	NA	NA
CTRU_005293	-4.05718	-2.70709	NA	NA
CTRU_005317	-4.68749	-4.90666	NA	NA
CTRU_005351	-5.34292	-6.65993	NA	NA
CTRU_005365	-1.89902	-1.86602	NA	NA
CTRU_005369	-4.62214	-4.02854	NA	NA
CTRU_005377	-5.83711	-2.81646	NA	NA
CTRU_005462	-4.15413	-2.41866	NA	NA
CTRU_005478	-5.82345	-3.87893	NA	NA
CTRU_005480	-2.68765	-1.57963	NA	NA
CTRU_005540	-3.23859	-6.6354	NA	NA
CTRU_005542	-1.96404	-7.27231	NA	NA
CTRU_005627	-4.46012	-3.27166	NA	NA
CTRU_005635	-3.57832	-2.86537	NA	NA
CTRU_005645	-2.77227	-3.30758	NA	NA
CTRU_005697	-2.22021	-2.38026	NA	NA
CTRU_005699	-1.68398	-2.0811	NA	NA
CTRU_005726	-4.08985	-1.47717	NA	NA
CTRU_005766	-4.64004	-3.35412	NA	NA
CTRU_005767	-2.22348	-2.81355	NA	NA
CTRU_005854	-1.35835	-2.52852	NA	NA
CTRU_005943	-3.72576	-2.23229	NA	NA
CTRU_005944	-1.95228	-2.60373	NA	NA
CTRU_005950	-1.21536	-1.32518	NA	NA
CTRU_005953	-2.01798	-1.2144	NA	NA
CTRU_005971	-1.32777	-2.09108	NA	NA
CTRU_005974	-2.40392	-4.51347	NA	NA
CTRU_005983	-1.97304	-2.32597	NA	NA
CTRU_006009	-1.88511	-1.58529	NA	NA
CTRU_006018	-2.26599	-2.02779	NA	NA
CTRU_006038	-5.73564	-6.54778	NA	NA
CTRU_006043	-2.15333	-4.77485	NA	NA
CTRU_006053	-2.56771	-4.93239	NA	NA
CTRU_006068	-1.61988	-1.77946	NA	NA
CTRU_006091	-2.61785	-2.0533	NA	NA
CTRU_006129	-1.75164	-3.30758	NA	NA
CTRU_006180	-2.86152	-2.35412	NA	NA
CTRU_006182	-4.04756	-2.14112	NA	NA
CTRU_006204	-1.6829	-1.73286	NA	NA
CTRU_006260	-1.80468	-1.58556	NA	NA
CTRU_006286	-3.64128	-2.43454	NA	NA
CTRU_006287	-6.21281	-3.9189	NA	NA
CTRU_006288	-2.85761	-1.793	NA	NA
CTRU_006291	-3.07989	-6.04838	NA	NA
CTRU_006297	-3.97038	-4.09669	NA	NA
CTRU_006347	-3.0078	-2.26029	NA	NA
CTRU_006361	-1.66962	-2.4377	NA	NA
CTRU_006364	-2.11829	-2.54409	NA	NA
CTRU_006366	-2.15434	-2.27612	NA	NA
CTRU_006375	-7.01996	-2.57792	NA	NA
CTRU_006376	-3.02488	-4.484	NA	NA
CTRU_006421	-2.7085	-1.34713	NA	NA
CTRU_006447	-5.7154	-3.64362	NA	NA
CTRU_006460	-9.82205	-4.09108	NA	NA
CTRU_006481	-8.40784	-5.22859	NA	NA
CTRU_006537	-1.33393	-2.64037	NA	NA
CTRU_006538	-6.35517	-4.25458	NA	NA
CTRU_006541	-3.43324	-2.92116	NA	NA
CTRU_006590	-1.88857	-2.176	NA	NA
CTRU_006594	-2.83216	-2.42627	NA	NA
CTRU_006595	-7.61948	-3.38213	NA	NA
CTRU_006596	-10.6359	-6.89844	NA	NA
CTRU_006605	-2.56265	-3.10173	NA	NA
CTRU_006632	-2.38527	-2.02373	NA	NA
CTRU_006758	-1.78516	-2.02854	NA	NA
CTRU_006766	-3.04235	-1.75866	NA	NA
CTRU_006806	-1.86221	-1.56886	NA	NA
CTRU_006826	-1.38349	-1.73934	NA	NA
CTRU_006834	-1.61413	-2.24931	NA	NA
CTRU_006836	-3.82806	-1.84131	NA	NA
CTRU_006873	-1.45041	-1.65981	NA	NA
CTRU_006886	-2.82485	-2.45117	NA	NA
CTRU_006920	-2.50777	-3.8369	NA	NA
CTRU_006947	-1.37713	-1.2864	NA	NA
CTRU_006950	-1.50023	-2.03567	NA	NA
CTRU_006961	-5.04594	-2.3217	NA	NA
CTRU_006964	-4.66709	-3.50612	NA	NA
CTRU_006965	-2.12286	-2.33394	NA	NA
CTRU_006987	-3.24979	-2.45445	NA	NA
CTRU_006988	-5.58377	-2.74898	NA	NA
CTRU_007033	-2.98861	-2.55765	NA	NA
CTRU_007041	-1.48345	-1.92571	NA	NA
CTRU_007093	-2.13236	-2.45167	NA	NA
CTRU_007099	-1.42132	-1.89401	NA	NA
CTRU_007123	-2.16584	-3.1765	NA	NA
CTRU_007132	-1.58448	-3.42701	NA	NA
CTRU_007222	-1.6077	-2.1303	NA	NA
CTRU_007267	-8.58207	-2.91691	NA	NA
CTRU_007296	-3.64514	-2.3639	NA	NA
CTRU_007301	-2.26003	-3.05008	NA	NA
CTRU_007325	-1.53366	-2.15207	NA	NA
CTRU_007326	-4.86568	-3.05866	NA	NA
CTRU_007336	-1.35037	-1.26978	NA	NA
CTRU_007337	-1.39398	-2.23833	NA	NA
CTRU_007345	-4.14912	-3.63455	NA	NA
CTRU_007346	-5.30934	-2.87069	NA	NA
CTRU_007348	-2.73195	-1.65319	NA	NA
CTRU_007380	-3.07099	-2.65206	NA	NA
CTRU_007381	-2.05719	-1.7179	NA	NA
CTRU_007436	-1.57962	-2.23603	NA	NA
CTRU_007470	-1.89769	-1.73618	NA	NA
CTRU_007479	-1.22786	-1.40563	NA	NA
CTRU_007482	-1.955	-1.55779	NA	NA
CTRU_007516	-2.05687	-1.50825	NA	NA
CTRU_007563	-1.37811	-1.27113	NA	NA
CTRU_007631	-1.68421	-1.94162	NA	NA
CTRU_007654	-2.22745	-3.69321	NA	NA
CTRU_007668	-1.30934	-1.98827	NA	NA
CTRU_007671	-3.06931	-1.99155	NA	NA
CTRU_007693	-3.45968	-2.68863	NA	NA
CTRU_007734	-1.86697	-2.43212	NA	NA
CTRU_007796	-3.13726	-1.52206	NA	NA
CTRU_007799	-4.59075	-7.43825	NA	NA
CTRU_007859	-1.40537	-1.87809	NA	NA
CTRU_007862	-5.2799	-1.95895	NA	NA
CTRU_007939	-1.62938	-2.95175	NA	NA
CTRU_007991	-2.15522	-1.73832	NA	NA
CTRU_008009	-5.41385	-4.27166	NA	NA
CTRU_008014	-4.08658	-4.30758	NA	NA
CTRU_008030	-2.04513	-3.45428	NA	NA
CTRU_008118	-1.28589	-1.66018	NA	NA
CTRU_008124	-1.80233	-1.55316	NA	NA
CTRU_008151	-1.6665	-1.4897	NA	NA
CTRU_008160	-2.88451	-1.88463	NA	NA
CTRU_008217	-1.49372	-1.79261	NA	NA
CTRU_008224	-1.95159	-2.34466	NA	NA
CTRU_008232	-6.34013	-7.38583	NA	NA
CTRU_008237	-2.51612	-4.4252	NA	NA
CTRU_008302	-4.0212	-8.50902	NA	NA
CTRU_008321	-2.38911	-1.46695	NA	NA
CTRU_008350	-2.76809	-2.11708	NA	NA
CTRU_008416	-2.15377	-2.47111	NA	NA
CTRU_008417	-1.62788	-1.64362	NA	NA
CTRU_008531	-1.65311	-2.51355	NA	NA
CTRU_008574	-1.86464	-1.8242	NA	NA
CTRU_008585	-5.48314	-1.99916	NA	NA
CTRU_008611	-3.77334	-1.35726	NA	NA
CTRU_008627	-3.07663	-2.4413	NA	NA
CTRU_008640	-10.6055	-4.13839	NA	NA
CTRU_008641	-8.53537	-3.39624	NA	NA
CTRU_008642	-7.83977	-4.32419	NA	NA
CTRU_008646	-3.64911	-2.02789	NA	NA
CTRU_008663	-2.95047	-2.24437	NA	NA
CTRU_008687	-10.6865	-3.18419	NA	NA
CTRU_008693	-2.11489	-2.00586	NA	NA
CTRU_008694	-7.3218	-4.27166	NA	NA
CTRU_008750	-4.02961	-1.91459	NA	NA
CTRU_008792	-1.23017	-2.78258	NA	NA
CTRU_008801	-1.64255	-1.39196	NA	NA
CTRU_008834	-2.10831	-1.54539	NA	NA
CTRU_008842	-3.30502	-2.20886	NA	NA
CTRU_008879	-4.69802	-2.03219	NA	NA
CTRU_008917	-1.53333	-2.99429	NA	NA
CTRU_008926	-4.16522	-2.73263	NA	NA
CTRU_008928	-3.82983	-1.52427	NA	NA
CTRU_008931	-1.45014	-1.37477	NA	NA
CTRU_008932	-1.94158	-2.18419	NA	NA
CTRU_008963	-2.77973	-1.91002	NA	NA
CTRU_009014	-1.43417	-1.99556	NA	NA
CTRU_009092	-3.98244	-2.18419	NA	NA
CTRU_009099	-1.17806	-1.65623	NA	NA
CTRU_009101	-1.9192	-1.8657	NA	NA
CTRU_009111	-3.60886	-3.91312	NA	NA
CTRU_009120	-1.68473	-2.29967	NA	NA
CTRU_009142	-2.62892	-1.26599	NA	NA
CTRU_009151	-1.64766	-1.35559	NA	NA
CTRU_009175	-2.41214	-1.1886	NA	NA
CTRU_009233	-1.8011	-1.83293	NA	NA
CTRU_009246	-2.91559	-2.35412	NA	NA
CTRU_009274	-1.93907	-2.11481	NA	NA
CTRU_009351	-2.36872	-2.02393	NA	NA
CTRU_009354	-1.57291	-3.14658	NA	NA
CTRU_009444	-2.14248	-4.26314	NA	NA
CTRU_009445	-2.77081	-2.15618	NA	NA
CTRU_009452	-2.68497	-1.40778	NA	NA
CTRU_009474	-5.85133	-4.18419	NA	NA
CTRU_009511	-2.35407	-2.92835	NA	NA
CTRU_009512	-1.52703	-2.90256	NA	NA
CTRU_009557	-2.69772	-1.94092	NA	NA
CTRU_009683	-5.79113	-4.57651	NA	NA
CTRU_009687	-2.65355	-1.20435	NA	NA
CTRU_009761	-2.56859	-2.89627	NA	NA
CTRU_009763	-3.99186	-4.96555	NA	NA
CTRU_009778	-3.85526	-3.82805	NA	NA
CTRU_009779	-2.26916	-3.91479	NA	NA
CTRU_009780	-1.83437	-1.88821	NA	NA
CTRU_009796	-2.07084	-2.39767	NA	NA
CTRU_009822	-6.74885	-5.48187	NA	NA
CTRU_009827	-3.6171	-2.6074	NA	NA
CTRU_009883	-3.95131	-6.16147	NA	NA
CTRU_009951	-1.19975	-1.47273	NA	NA
CTRU_009953	-6.25919	-4.32011	NA	NA
CTRU_009986	-1.39314	-1.64038	NA	NA
CTRU_009991	-1.63852	-1.46173	NA	NA
CTRU_009996	-1.33	-1.71993	NA	NA
CTRU_010018	-2.87602	-5.38059	NA	NA
CTRU_010081	-8.53203	-1.90504	NA	NA
CTRU_010104	-2.7295	-1.76273	NA	NA
CTRU_010137	-4.94411	-1.70775	NA	NA
CTRU_010179	-1.61382	-1.49512	NA	NA
CTRU_010196	-1.68872	-2.79758	NA	NA
CTRU_010212	-1.92863	-1.94973	NA	NA
CTRU_010223	-8.01861	-3.51571	NA	NA
CTRU_010227	-4.96832	-5.17666	NA	NA
CTRU_010266	-1.67692	-1.61591	NA	NA
CTRU_010270	-2.40495	-3.05866	NA	NA
CTRU_010316	-6.74314	-3.42959	NA	NA
CTRU_010317	-3.19886	-1.59923	NA	NA
CTRU_010340	-1.68692	-1.63678	NA	NA
CTRU_010355	-3.15089	-4.29753	NA	NA
CTRU_010358	-3.92684	-3.79919	NA	NA
CTRU_010374	-3.55429	-1.57819	NA	NA
CTRU_010409	-1.75411	-1.91167	NA	NA
CTRU_010419	-2.13793	-2.14445	NA	NA
CTRU_010427	-2.93927	-2.11874	NA	NA
CTRU_010441	-1.23792	-1.57722	NA	NA
CTRU_010472	-1.70641	-1.22372	NA	NA
CTRU_010550	-3.22077	-2.69413	NA	NA
CTRU_010572	-1.53611	-1.2968	NA	NA
CTRU_010579	-3.66112	-4.61046	NA	NA
CTRU_010616	-1.19214	-1.28955	NA	NA
CTRU_010626	-1.5701	-2.92566	NA	NA
CTRU_010648	-11.1195	-2.88463	NA	NA
CTRU_010691	-1.583	-1.72576	NA	NA
CTRU_010719	-1.48244	-1.20091	NA	NA
CTRU_010755	-3.98139	-1.79492	NA	NA
CTRU_010756	-3.44717	-3.99155	NA	NA
CTRU_010759	-2.08324	-4.58507	NA	NA
CTRU_010791	-4.85112	-2.12279	NA	NA
CTRU_010792	-3.553	-2.55894	NA	NA
CTRU_010803	-3.04505	-1.44879	NA	NA
CTRU_010859	-2.1342	-2.97911	NA	NA
CTRU_010900	-3.74109	-2.10402	NA	NA
CTRU_010901	-6.62052	-1.71853	NA	NA
CTRU_010915	-1.58196	-1.53686	NA	NA
CTRU_010916	-3.83552	-4.70775	NA	NA
CTRU_010923	-1.90252	-1.71707	NA	NA
CTRU_010969	-1.71567	-1.31895	NA	NA
CTRU_010970	-3.25144	-1.45947	NA	NA
CTRU_010972	-2.12382	-1.51458	NA	NA
CTRU_011005	-1.81101	-2.59239	NA	NA
CTRU_011066	-2.98633	-2.18965	NA	NA
CTRU_011080	-1.93857	-1.25263	NA	NA
CTRU_011121	-1.99235	-2.78374	NA	NA
CTRU_011129	-2.68666	-1.72559	NA	NA
CTRU_011130	-3.39989	-2.26751	NA	NA
CTRU_011140	-1.3428	-1.58313	NA	NA
CTRU_011141	-2.49919	-1.98529	NA	NA
CTRU_011142	-3.4853	-1.41508	NA	NA
CTRU_011179	-2.15506	-2.41301	NA	NA
CTRU_011181	-1.77795	-1.75156	NA	NA
CTRU_011297	-4.52645	-3.43212	NA	NA
CTRU_011299	-5.72187	-3.70775	NA	NA
CTRU_011326	-4.24731	-2.4252	NA	NA
CTRU_011401	-2.06022	-1.95913	NA	NA
CTRU_011402	-1.2666	-1.91691	NA	NA
CTRU_011420	-1.21997	-1.30768	NA	NA
CTRU_011447	-7.32968	-2.99155	NA	NA
CTRU_011448	-1.75744	-1.61239	NA	NA
CTRU_011476	-3.88444	-1.91538	NA	NA
CTRU_011561	-3.45251	-1.56114	NA	NA
CTRU_011586	-1.75344	-1.59228	NA	NA
CTRU_011640	-3.27854	-1.63745	NA	NA
CTRU_011649	-3.1196	-3.04217	NA	NA
CTRU_011650	-3.7942	-5.75725	NA	NA
CTRU_011663	-3.79262	-2.74713	NA	NA
CTRU_011795	-2.97615	-1.71817	NA	NA
CTRU_011850	-5.4444	-2.22684	NA	NA
CTRU_011908	-6.2917	-8.42737	NA	NA
CTRU_011910	-3.86538	-6.01851	NA	NA
CTRU_011923	-6.81853	-7.6518	NA	NA
CTRU_011941	-2.92664	-6.22859	NA	NA
CTRU_011995	-3.06261	-2.33475	NA	NA
CTRU_012010	-2.01064	-2.59228	NA	NA
CTRU_012097	-2.88339	-2.62029	NA	NA
CTRU_012098	-2.78612	-2.37837	NA	NA
CTRU_012150	-2.36258	-2.57122	NA	NA
CTRU_012164	-2.63138	-1.66431	NA	NA
CTRU_012165	-4.60078	-4.35885	NA	NA
CTRU_012188	-1.71766	-1.62181	NA	NA
CTRU_012264	-4.09475	-6.66515	NA	NA
CTRU_012280	-5.42029	-2.83088	NA	NA
CTRU_012293	-3.67155	-6.01708	NA	NA
CTRU_012320	-3.37366	-5.96555	NA	NA
CTRU_012321	-3.77464	-5.83954	NA	NA
CTRU_012341	-1.67193	-2.07255	NA	NA
CTRU_012472	-9.12753	-2.82805	NA	NA
CTRU_012494	-1.67317	-2.15103	NA	NA
CTRU_012514	-4.11306	-3.29967	NA	NA
CTRU_012515	-1.90252	-1.69569	NA	NA
CTRU_012536	-2.96313	-2.66224	NA	NA
CTRU_012537	-5.6819	-3.08036	NA	NA
CTRU_012616	-4.39051	-2.58544	NA	NA
CTRU_012618	-3.90301	-1.8173	NA	NA
CTRU_012619	-4.255	-2.86491	NA	NA
CTRU_012620	-6.22911	-2.54676	NA	NA
CTRU_012621	-6.20268	-3.44723	NA	NA
CTRU_012623	-3.64219	-1.84316	NA	NA
CTRU_012655	-4.25056	-4.70775	NA	NA
CTRU_012740	-6.01688	-4.83524	NA	NA
CTRU_012768	-2.34625	-3.00816	NA	NA
CTRU_012833	-1.29538	-1.23958	NA	NA
CTRU_012859	-1.88215	-2.46503	NA	NA
CTRU_012866	-1.73117	-2.96359	NA	NA
CTRU_012875	-2.33843	-2.31678	NA	NA
CTRU_012893	-1.50414	-1.54374	NA	NA
CTRU_012934	-1.41838	-1.75248	NA	NA
CTRU_012935	-3.58108	-2.15618	NA	NA
CTRU_012973	-2.26887	-4.21661	NA	NA
CTRU_012991	-6.13044	-3.50612	NA	NA
CTRU_013003	-8.65099	-4.45721	NA	NA
CTRU_013015	-2.63505	-2.16732	NA	NA
CTRU_013020	-2.9548	-1.59185	NA	NA
CTRU_013041	-1.30132	-1.61286	NA	NA
CTRU_013097	-4.52093	-1.74284	NA	NA
CTRU_013101	-2.29209	-2.25458	NA	NA
CTRU_013125	-2.19102	-3.59679	NA	NA
CTRU_013168	-2.31912	-4.21884	NA	NA
CTRU_013195	-5.20933	-2.20049	NA	NA
CTRU_013196	-10.0825	-4.41685	NA	NA
CTRU_013209	-5.08324	-5.24309	NA	NA
CTRU_013210	-3.78382	-3.94501	NA	NA
CTRU_013279	-4.34206	-2.18419	NA	NA
CTRU_013287	-1.83395	-3.99187	NA	NA
CTRU_013354	-3.44856	-2.36477	NA	NA
CTRU_013401	-2.04974	-3.50228	NA	NA
CTRU_013406	-2.67155	-3.54175	NA	NA
CTRU_013407	-7.63738	-4.12279	NA	NA
CTRU_013416	-3.68484	-6.90871	NA	NA
CTRU_013418	-3.25453	-3.29967	NA	NA
CTRU_013429	-1.61393	-1.41406	NA	NA
CTRU_013458	-2.07124	-8.5869	NA	NA
CTRU_013459	-5.22954	-11.7433	NA	NA
CTRU_013533	-3.71304	-3.90467	NA	NA
CTRU_013534	-2.56891	-2.04838	NA	NA
CTRU_013631	-2.04897	-2.6414	NA	NA
CTRU_013651	-5.57725	-3.18419	NA	NA
